# Supplementary material for: Chronological aging impacts abundance, function and microRNA content of extracellular vesicles produced by human epidermal keratinocytes
Source: publisher site journal article supplement (doi:10.18632/aging.205245), 2023-11-27
Supplement: Supplementary file [file aging-v15i22-205245-supplementary-material-SD1.pdf]

SUPPLEMENTARY FIGURES

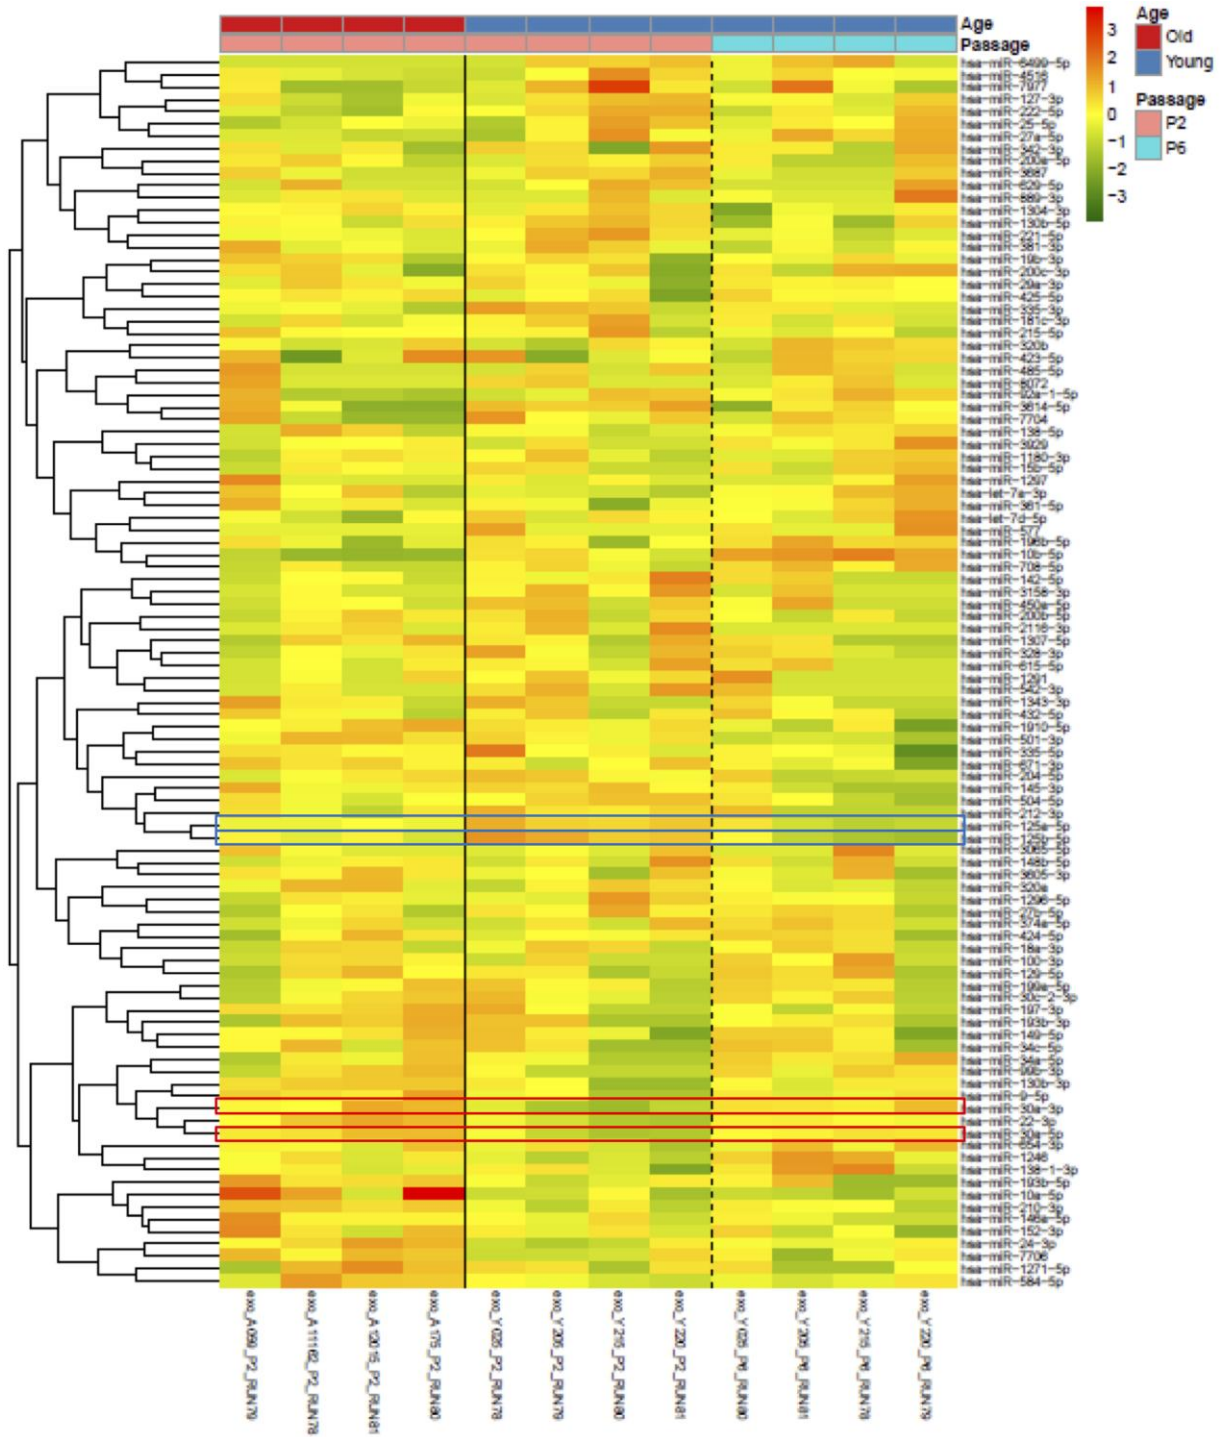

**Supplementary Figure 1. Heatmap representing the expression of the 100 miRNAs with the highest variance in the 12 EV samples analyzed in our study.** The miRNAs that are significantly ( $P_{adj} < 0.05$ ) induced in old keratinocytes EVs compared to young keratinocytes EVs at early passage (P2) are indicated by a red box. The miRNAs that are significantly ( $P_{adj} < 0.05$ ) repressed in old keratinocytes EVs compared to young keratinocytes EVs at early passage (P2) are indicated by a blue box.

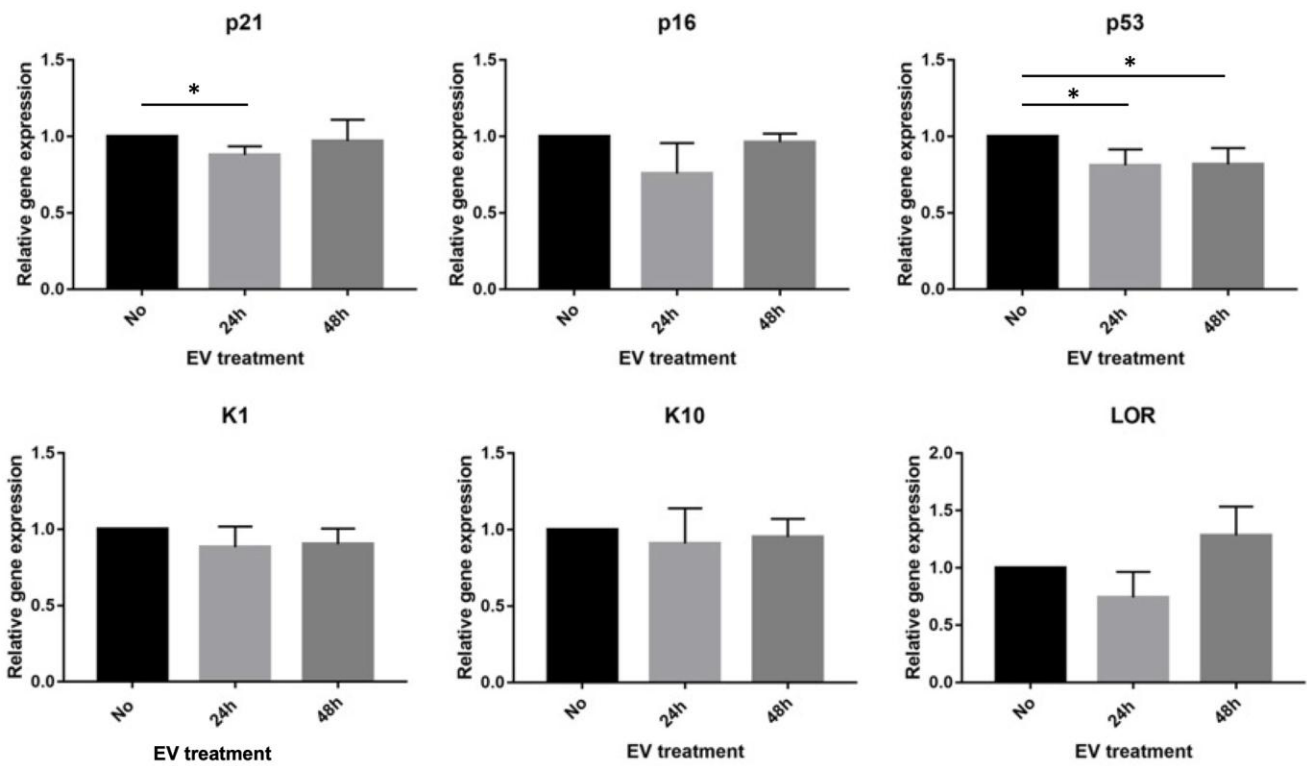

Supplementary Figure 2. Expression analysis of transcripts for P21, P16, P53, KRT1 (K1), KRT10 (K10) and lorcinin (LOR) in young keratinocytes treated with EVs from young keratinocytes. Data were normalized to the non-treated condition. (\* $p$ -value < 0.05.  $n = 3$  Student's  $t$ -test).

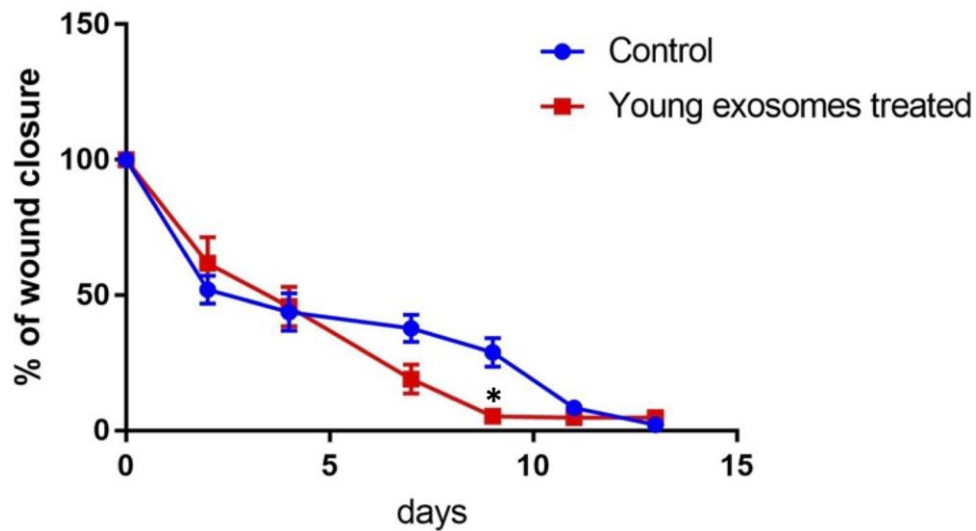

Supplementary Figure 3. Wound closure assay on mice treated with EVs from young keratinocytes. Quantitative analysis of wound healing closure in each group ( $n = 4$ ), expressed as a percentage of the initial wound area (\* $p$ -value < 0.05. Student's  $t$ -test).
